# Supplementary material for: Mutation in Fbxo11 Leads to Altered Immune Cell Content in Jeff Mouse Model of Otitis Media
Source: PubMed Central journal article supplement (PMC7026503; doi:10.3389/fgene.2020.00050), 2020-02-11

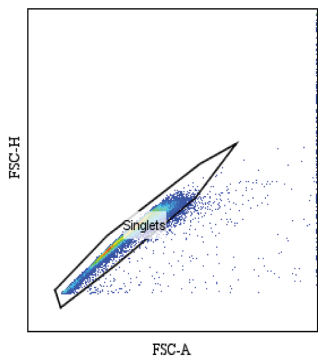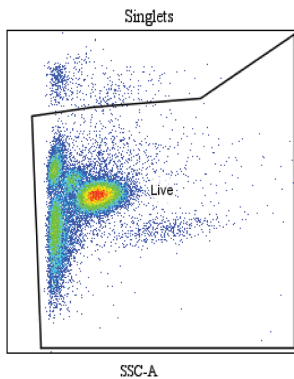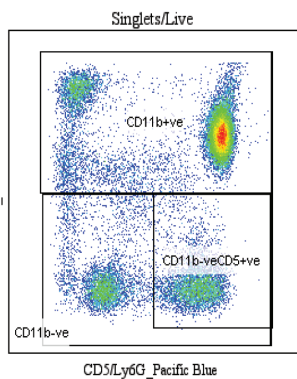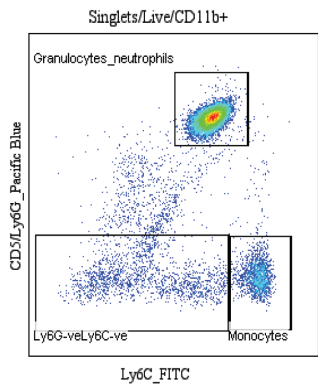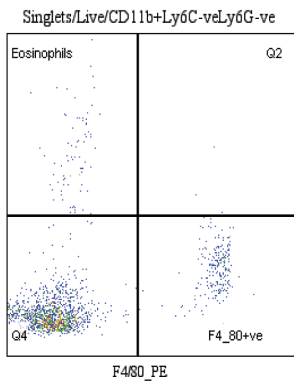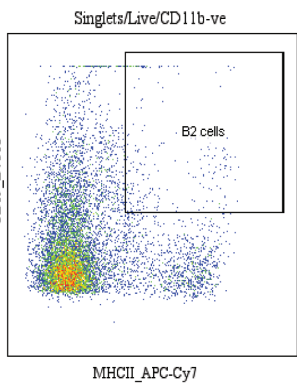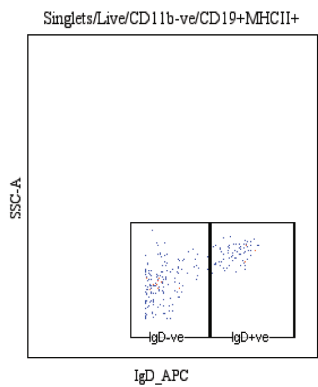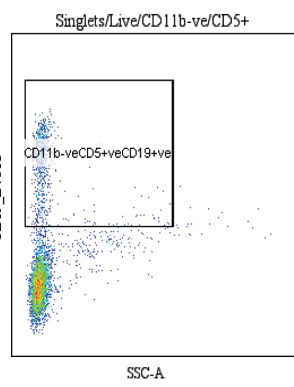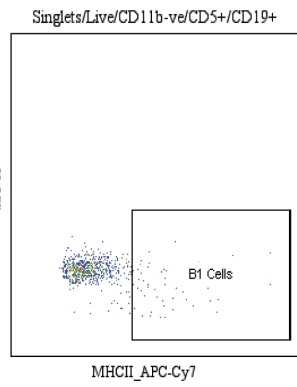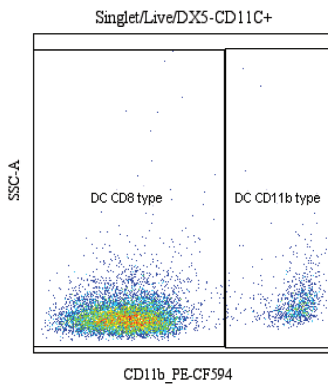

Supplement: Image_2.pdf [file Image_2.pdf]
