# Supplementary material for: Mutation in Fbxo11 Leads to Altered Immune Cell Content in Jeff Mouse Model of Otitis Media
Source: PubMed Central journal article supplement (PMC7026503; doi:10.3389/fgene.2020.00050), 2020-02-11
Supplement: Table_1.pdf [file Table_1.pdf]

| <b>Panel 1:</b>                                                         |                    |                      |                |                               |
|-------------------------------------------------------------------------|--------------------|----------------------|----------------|-------------------------------|
| <b>Marker / Antigen</b>                                                 | <b>Fluorophore</b> | <b>Concentration</b> | <b>Source</b>  | <b>Cat no.</b>                |
| Live/dead                                                               | SytoxBlue          | 1:10000              | Invitrogen     | S11348                        |
| CD5                                                                     | BV421              | 1:200                | BD biosciences | 562739                        |
| CD4                                                                     | FITC               | 1:800                | BD biosciences | 553047                        |
| CD8                                                                     | PE-CF594           | 1:400                | BD biosciences | 562283                        |
| CD25                                                                    | PECy7              | 1:400                | BD biosciences | 552880                        |
| CD62L                                                                   | APC-Cy7            | 1:1600               | BD biosciences | 560514                        |
| CD44                                                                    | PE                 | 1:200                | BD biosciences | 553134                        |
| TCRd                                                                    | BV510              | 1:100                | BD biosciences | 563218                        |
| DX5 for <i>Jeff</i> mice or<br>NK1.1 for <i>Fbxo11<sup>tmb2/+</sup></i> | APC                | 1:200                | BD biosciences | 560628 (DX5)<br>550627(NK1.1) |
| <b>Panel 2:</b>                                                         |                    |                      |                |                               |
| <b>Marker / Antigen</b>                                                 | <b>Fluorophore</b> | <b>Concentration</b> | <b>Source</b>  | <b>Cat no.</b>                |
| Live/dead                                                               | SytoxBlue          | 1:10000              | Invitrogen     | S11348                        |
| F4/80                                                                   | PE                 | 1:400                | BD biosciences | 552957                        |
| CD19                                                                    | BV510              | 1:400                | BD biosciences | 562956                        |
| DX5 for <i>Jeff</i> mice or<br>NK1.1 for <i>Fbxo11<sup>tmb2/+</sup></i> | APC                | 1:200                | BD biosciences | 560628 (DX5)<br>550627(NK1.1) |
| Ly6C                                                                    | FITC               | 1:400                | BD biosciences | 553104                        |
| Ly6G                                                                    | BV421              | 1:400                | BD biosciences | 562737                        |
| CD5                                                                     | BV421              | 1:200                | BD biosciences | 562739                        |
| CD11b                                                                   | PE-CF594           | 1:4800               | BD biosciences | 562287                        |
| CD11c                                                                   | PECy7              | 1:400                | BD biosciences | 558079                        |
| IgD                                                                     | APC                | 1:200                | BD biosciences | 560868                        |
| MHCII (anti-Mouse I-A/I-E)                                              | APC-Cy7            | 1:200                | BioLegend      | 107628                        |
