# Supplementary material for: Mutation in Fbxo11 Leads to Altered Immune Cell Content in Jeff Mouse Model of Otitis Media
Source: PubMed Central journal article supplement (PMC7026503; doi:10.3389/fgene.2020.00050), 2020-02-11
Supplement: Table_2.pdf [file Table_2.pdf]

**Gating strategy employed for classification of immune cells**

| <b>Cells</b>               | <b>Positive Markers</b>         | <b>Negative markers</b>   |
|----------------------------|---------------------------------|---------------------------|
| Granulocytes/neutrophils   | CD11b+Ly6G+Ly6C+                | Sytox blue                |
| Eosinophils                | CD11b+SSC-Ahi                   | Sytox blue/Ly6C-Ly6G-     |
| Macrophages                | CD11b+SSC <sup>low</sup> F4/80+ | Sytox blue/Ly6C-Ly6G-     |
| Monocytes                  | CD11b+Ly6C+                     | Sytox blue/Ly6G-          |
| Dendritic cells_CD8 type   | CD11C+MHCII+                    | Sytox blue/DX5-CD11b-     |
| Dendritic cells_CD11b type | CD11C+MHCII+CD11b+              | Sytox blue/DX5-           |
| Natural killer (NK) cells  | DX5+                            | Sytox blue/CD5-           |
| T helper (Th)              | CD5+CD4+                        | Sytox blue/CD8-           |
| T helper effector          | CD5+CD4+CD44+                   | Sytox blue/CD8-           |
| T regulatory effector      | CD5+CD4+CD25+CD44+              | Sytox blue/CD8-           |
| T regulatory               | CD5+CD4+CD25+                   | Sytox blue/CD8-           |
| T cytotoxic (Tcyto)        | CD5+CD8+                        | Sytox blue/CD4-           |
| T cytotoxic effector       | CD5+CD8+CD44+                   | Sytox blue/CD4-CD62L-     |
| T cytotoxic naive          | CD5+CD8+CD62L+                  | Sytox blue/CD4-CD44-      |
| T cytotoxic resting        | CD5+CD8+CD62L+CD44+             | Sytox blue/CD4-           |
| B2 mature cells            | CD19+MHCII+IgD+                 | Sytox blue/CD11b-CD5-     |
| B2 immature cells          | CD19+MHCII+                     | Sytox blue/CD11b-CD5-IgD- |
| B1 cells                   | CD5+CD19+MHCII+                 | Sytox blue/CD11b-         |
| NK-T cells                 | CD5+CD44+DX5+                   | Sytox blue                |
| NK-T cell effector         | CD5+CD44+DX5+                   | Sytox blue/CD62L-         |
| NK-T cell resting          | CD5+CD44+DX5+CD62L+             | Sytox blue                |
