# Supplementary material for: Mutation in Fbxo11 Leads to Altered Immune Cell Content in Jeff Mouse Model of Otitis Media
Source: PubMed Central journal article supplement (PMC7026503; doi:10.3389/fgene.2020.00050), 2020-02-11
Supplement: Table_3.pdf [file Table_3.pdf]

**Table S3:** Immune cell percentage in *Fbxo11*<sup>+/+</sup> and *Fbxo11*<sup>tmb2/+</sup> mouse obtained by flow cytometry.

| Immune cells                 | Blood                        |                                 | Lungs                        |                                 | Spleen                       |                                 |
|------------------------------|------------------------------|---------------------------------|------------------------------|---------------------------------|------------------------------|---------------------------------|
|                              | <i>Fbxo11</i> <sup>+/+</sup> | <i>Fbxo11</i> <sup>tmb2/+</sup> | <i>Fbxo11</i> <sup>+/+</sup> | <i>Fbxo11</i> <sup>tmb2/+</sup> | <i>Fbxo11</i> <sup>+/+</sup> | <i>Fbxo11</i> <sup>tmb2/+</sup> |
| Granulocytes                 | 11.99<br>(±1.01)             | 15.54<br>(±1.62)                | 6.54<br>(±0.79)              | 7.88<br>(±1.06)                 | 1.81<br>(±0.43)              | 3.52<br>(±1.39)                 |
| Eosinophils                  | 1.02<br>(±0.39)              | 0.82<br>(±0.45)                 | 0.02<br>(±0.01)              | 0.02<br>(±0.002)                | 0.04<br>(±0.01)              | 0.038<br>(±0.02)                |
| Macrophages                  | 0.95<br>(±0.09)              | 1.72<br>(±0.17)                 | 0.39<br>(±0.04)              | 0.86<br>(±0.07)                 | 0.39<br>(±0.06)              | 0.51<br>(±0.06)                 |
| Monocytes                    | 6.66<br>(±0.69)              | 7.97<br>(±1.36)                 | 1.43<br>(±0.21)              | 2.19<br>(±0.64)                 | 0.94<br>(±0.07)              | 1.64<br>(±0.50)                 |
| DC CD8 type                  | 38.54<br>(±3.39)             | 29.66<br>(±5.37)                | 12.1<br>(±1.52)              | 13.4<br>(±1.30)                 | 55.92<br>(±0.56)             | 52.04<br>(±1.30)                |
| DC CD11b type                | 2.65<br>(±0.17)              | 3.61<br>(±0.22)                 | 1.87<br>(±0.15)              | 2.28<br>(±0.22)                 | 4.14<br>(±0.67)              | 3.95<br>(±0.80)                 |
| Progenitor DC (pDC)          | 3.36<br>(±0.64)              | 2.57<br>(±0.69)                 | 13.50<br>(±0.89)             | 13.30<br>(±0.62)                | 1.66<br>(±0.54)              | 2.26<br>(±0.41)                 |
| NK cells                     | 6.92<br>(±0.36)              | 5.80<br>(±0.27)                 | 1.45<br>(±0.17)              | 1.89<br>(±0.27)                 | 3.64<br>(±0.32)              | 2.37<br>(±0.21)                 |
| T helper (Th) Effector       | 1.26<br>(±0.27)              | 1.53<br>(±0.09)                 | 0.36<br>(±0.13)              | 0.23<br>(±0.04)                 | 0.47<br>(±0.08)              | 0.42<br>(±0.05)                 |
| T helper (Th) Resting        | 2.42<br>(±0.26)              | 2.60<br>(±0.13)                 | 1.65<br>(±0.50)              | 1.27<br>(±0.05)                 | 4.67<br>(±1.28)              | 3.61<br>(±0.71)                 |
| T regulator (T reg) Effector | 0.54<br>(±0.07)              | 0.67<br>(±0.03)                 | 0.32<br>(±0.12)              | 0.33<br>(±0.008)                | 0.54<br>(±0.08)              | 0.65<br>(±0.10)                 |
| T regulator (T reg) Resting  | 0.29<br>(±0.06)              | 0.35<br>(±0.08)                 | 0.43<br>(±0.06)              | 0.38<br>(±0.04)                 | 2.89<br>(±1.47)              | 4.22<br>(±1.17)                 |
| T cytotoxic Effector         | 0.66<br>(±0.07)              | 0.72<br>(±0.06)                 | 0.22<br>(±0.10)              | 0.34<br>(±0.05)                 | 0.59<br>(±0.09)              | 0.54<br>(±0.04)                 |
| T cytotoxic Naive            | 2.52<br>(±0.22)              | 2.83<br>(±0.37)                 | 1.08<br>(±0.11)              | 0.96<br>(±0.05)                 | 5.28<br>(±0.35)              | 4.81<br>(±0.14)                 |
| T cytotoxic Resting          | 1.63<br>(±0.24)              | 2.19<br>(±0.48)                 | 0.38<br>(±0.07)              | 0.41<br>(±0.03)                 | 3.90<br>(±0.35)              | 4.13<br>(±0.64)                 |
| B2 total                     | 19.21<br>(±5.02)             | 20.33<br>(±4.38)                | 11.10<br>(±1.09)             | 9.54<br>(±0.48)                 | 10.13<br>(±4.89)             | 18.94<br>(±2.25)                |
| B2 mature                    | 1.17<br>(±0.52)              | 1.06<br>(±0.42)                 | 2.26<br>(±0.48)              | 2.3<br>(±0.05)                  | 1.26<br>(±0.82)              | 2.13<br>(±0.86)                 |
| B2 immature                  | 18.03<br>(±4.36)             | 19.27<br>(±3.85)                | 8.57<br>(±0.85)              | 7.02<br>(±0.55)                 | 8.60<br>(±1.84)              | 16.23<br>(±2.18)                |
| B1 total                     | 0.71<br>(±0.21)              | 0.95<br>(±0.32)                 | 8.68<br>(±0.48)              | 8.97<br>(±0.21)                 | 2.85<br>(±1.63)              | 4.51<br>(±1.61)                 |
| NKT Effector                 | 2.98<br>(±0.66)              | 3.37<br>(±0.42)                 | 14<br>(±0.88)                | 17.46<br>(±1.71)                | 1.45<br>(±0.11)              | 1.92<br>(±0.11)                 |
| Invariant NKT (iNKTs)        | 2.99<br>(±0.91)              | 3.26<br>(±0.57)                 | 7.08<br>(±1.91)              | 9.75<br>(±1.32)                 | 1.46<br>(±0.12)              | 1.91<br>(±0.15)                 |
| NKT Resting                  | 2.03<br>(±0.88)              | 1.98<br>(±0.58)                 | 1.69<br>(±0.11)              | 1.40<br>(±0.12)                 | 1.61<br>(±0.15)              | 1.93<br>(±0.25)                 |

Values are the percentage of total live cells. Underlined values are significantly increased whereas those in italics are significantly decreased in *Fbxo11*<sup>+/+</sup> compared to *Fbxo11*<sup>tmb2/+</sup> mice. MEF – middle ear fluid, DC – Dendritic cell, NK- Natural killer cell.
